# Supplementary material
Source: PubMed Central journal article supplement (PMC7275724)
Supplement: pnas.1922793117.sapp.pdf [file pnas.1922793117.sapp.pdf]

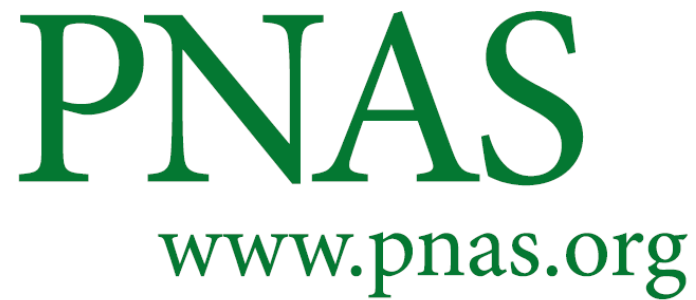

Supplementary Information for

Imaging Lutein and Zeaxanthin in the Human Retina with Confocal Resonance Raman Microscopy

Binxing Li, Evan W. George, Gregory T. Rognon, Aruna Gorusupudi, Arunkumar Ranganathan, Fu-Yen Chang, Linjia Shi, Jeanne M. Frederick, Paul S. Bernstein

Paul S. Bernstein

Email: [paul.bernstein@hsc.utah.edu](mailto:paul.bernstein@hsc.utah.edu)

**This PDF file includes:**

Supplementary text  
Figures S1 to S5

## Supplementary Information Text

### Supplemental Materials and Methods.

**HPLC analysis.** 10  $\mu$ M of lutein and 10  $\mu$ M of zeaxanthin methanol solutions were used to prepare the mixed carotenoid solutions, in which the percentage of lutein are 0%, 20%, 40%, 60%, 80%, and 100%, respectively. The final volume of each carotenoid preparation is 400  $\mu$ L. 350  $\mu$ L was added to a quartz cuvette for Raman measurement, and the left 50  $\mu$ L was dried down by vacuum evaporation and dissolved in 1 mL of a reversed-phase solvent containing 80% methanol and 20% Methyl tert-butyl ether (MTBE) for HPLC analysis. Carotenoids were separated on an HPLC system (Thermo Scientific, Waltham, MA ) equipped with an autosampler and photodiode array (PDA) detector, on a C30 column (YMC Europe GmbH, Germany, 250 x 4.6 mm i.d). The injection volume was 50  $\mu$ L with a mobile phase flow rate of 1.0 mL/min. The gradient program consisted of methanol (A) and MTBE (B). The gradient included 95% A at 0 min, 70% A at 20 min, 40% A at 30 min, 5% A at 40 min, 95% A at 45 min, and hold at 95% until 50 min. The column was maintained at room temperature with a PDA detector operated at 450nm. Peaks were identified and confirmed using PDA spectra and by co-elution with authentic standards as necessary. Lutein and zeaxanthin were quantified according to the elution peak area. All the tests were repeated three times, and the data were plotted using Microsoft Excel software.

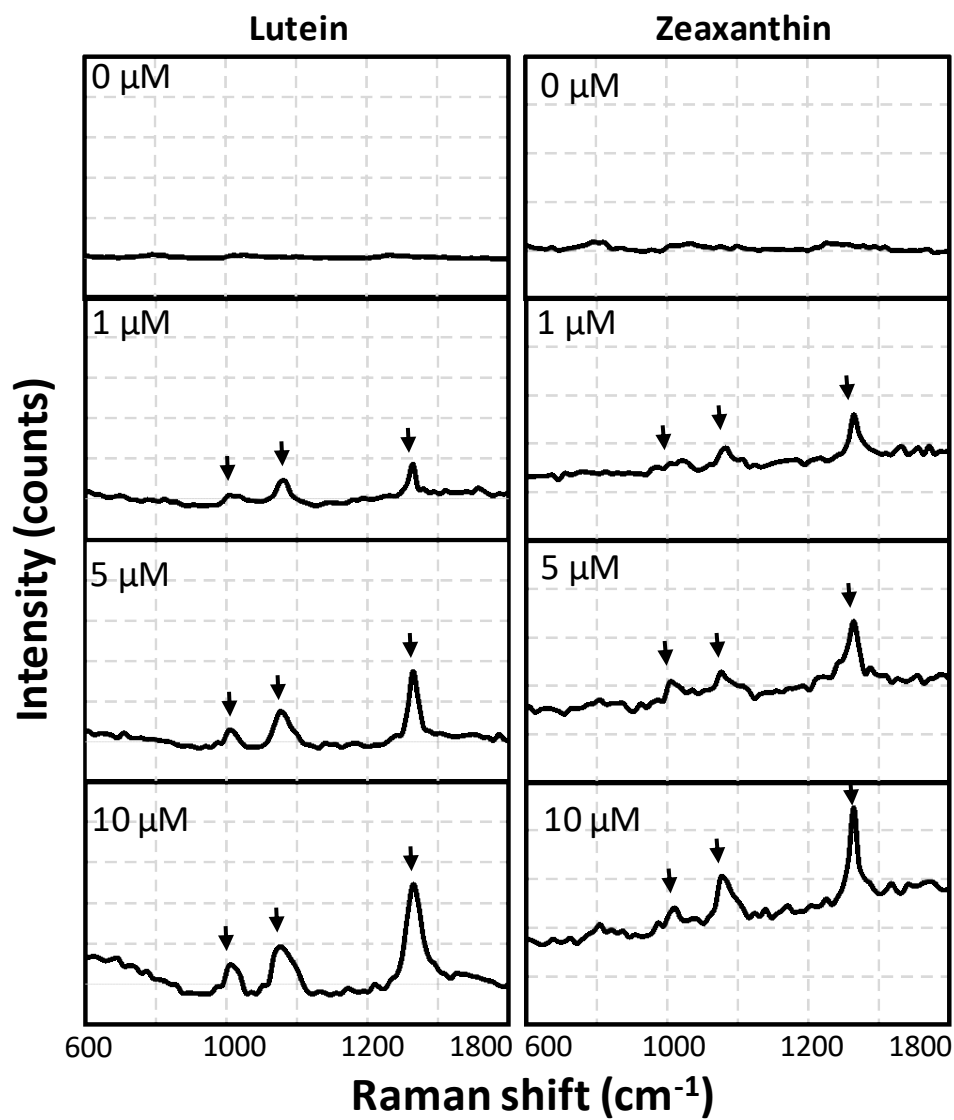

**Fig. S1.** Raman spectra of lutein and zeaxanthin dissolved in methanol at concentrations of 0  $\mu\text{M}$ , 1  $\mu\text{M}$ , 5  $\mu\text{M}$ , and 10  $\mu\text{M}$ . Arrowheads indicate the major peaks in the Raman spectra of lutein and zeaxanthin, and they are located at  $\sim 1500 \text{ cm}^{-1}$  (v1),  $1150 \text{ cm}^{-1}$  (v2), and  $1000 \text{ cm}^{-1}$  (v3), respectively.

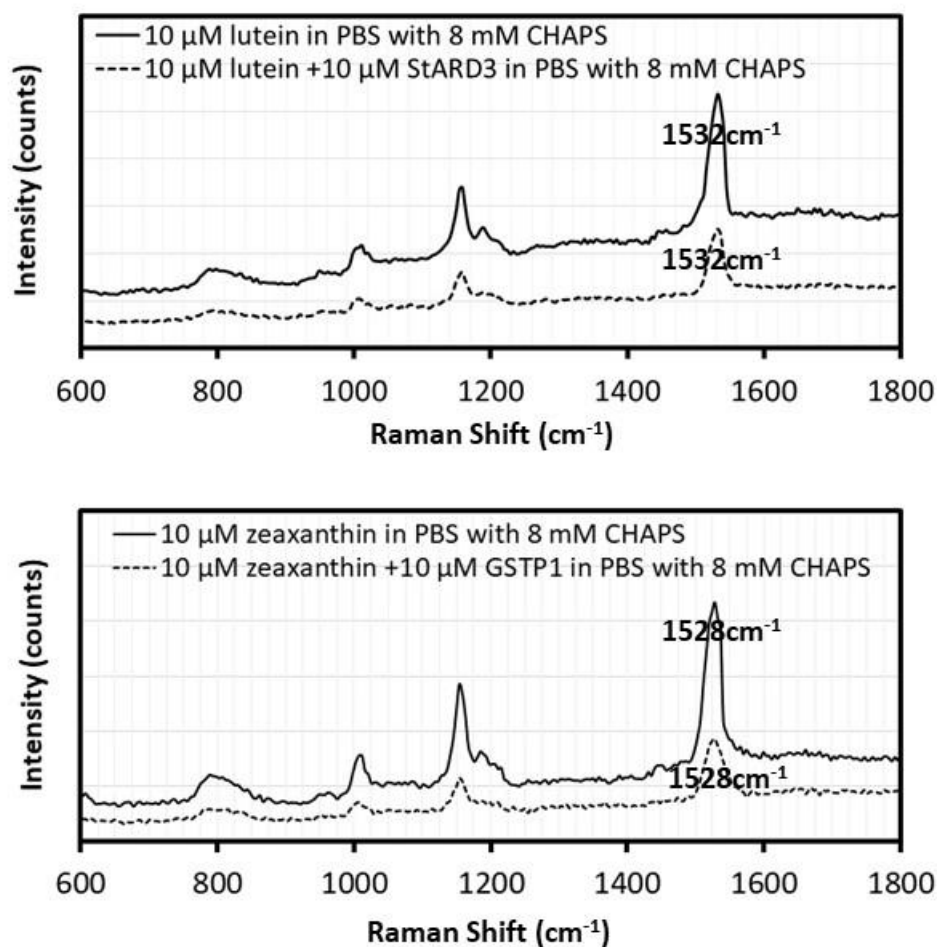

**Fig. S2.** Raman spectra of carotenoids free and bound to carotenoid-binding proteins in PBS buffer. No shift was observed between the v1 peaks of carotenoids and their binding proteins. (Top) Solid line, 10 μM lutein; dotted line, 10 μM lutein-StARD3 protein complex; (Bottom) Solid line, 10 μM zeaxanthin; dotted line, 10 μM zeaxanthin-GSTP1 protein complex. To solubilize lutein and zeaxanthin, 8 mM CHAPS detergent was added to the PBS buffer.

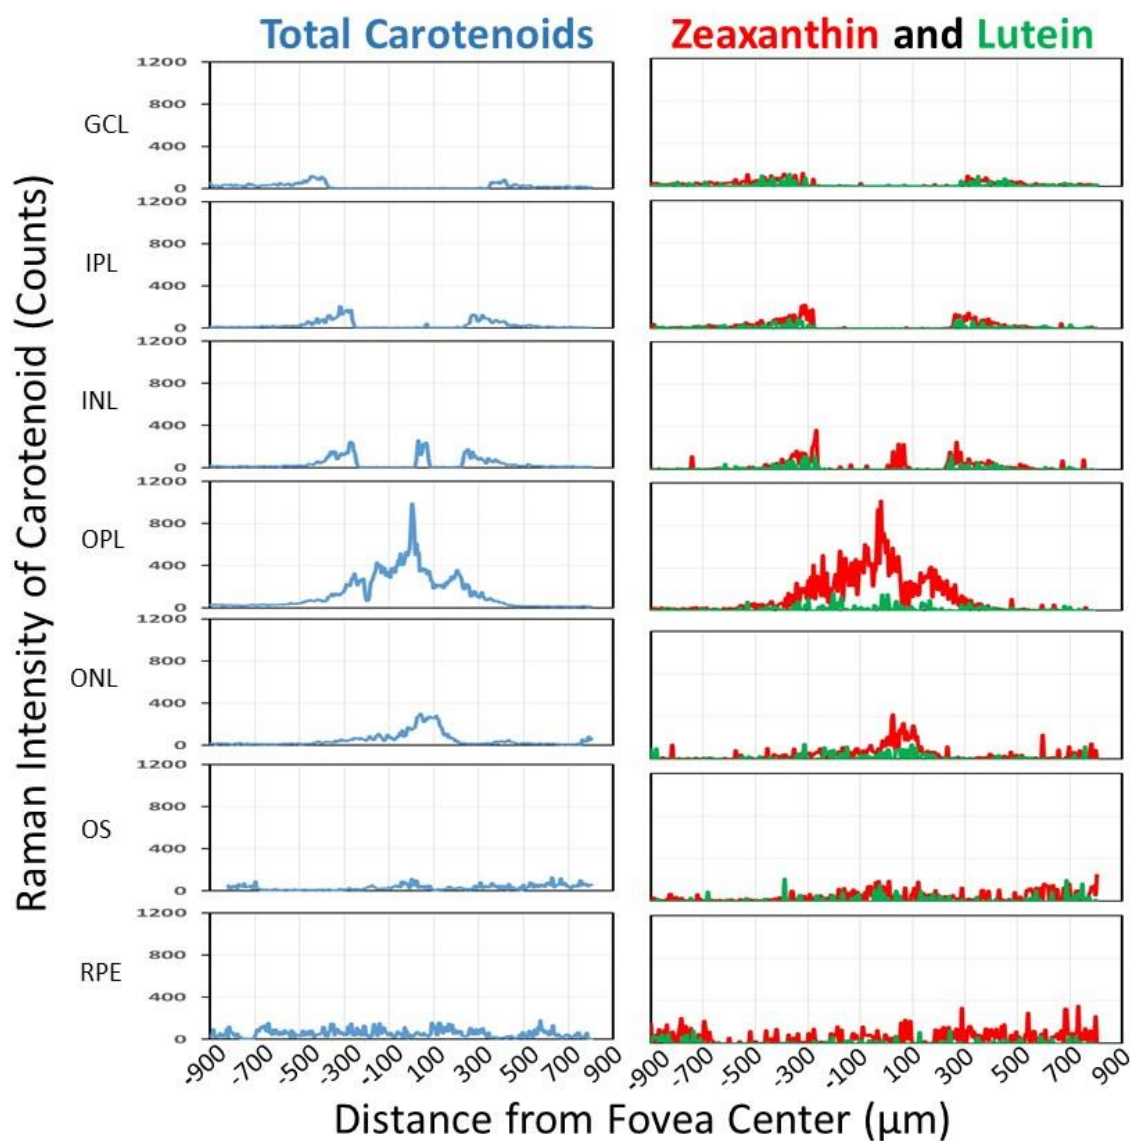

**Fig. S3.** Raman intensity profile in horizontal cuts at each retinal layer from the human retinal section shown in **Figure 6**. Blue, total carotenoids; green, lutein; red, zeaxanthin. A 3-pixel-wide horizontal line was drawn at the level of each retinal layer, and the average intensity of the v1 peak of the carotenoid at each level was plotted.

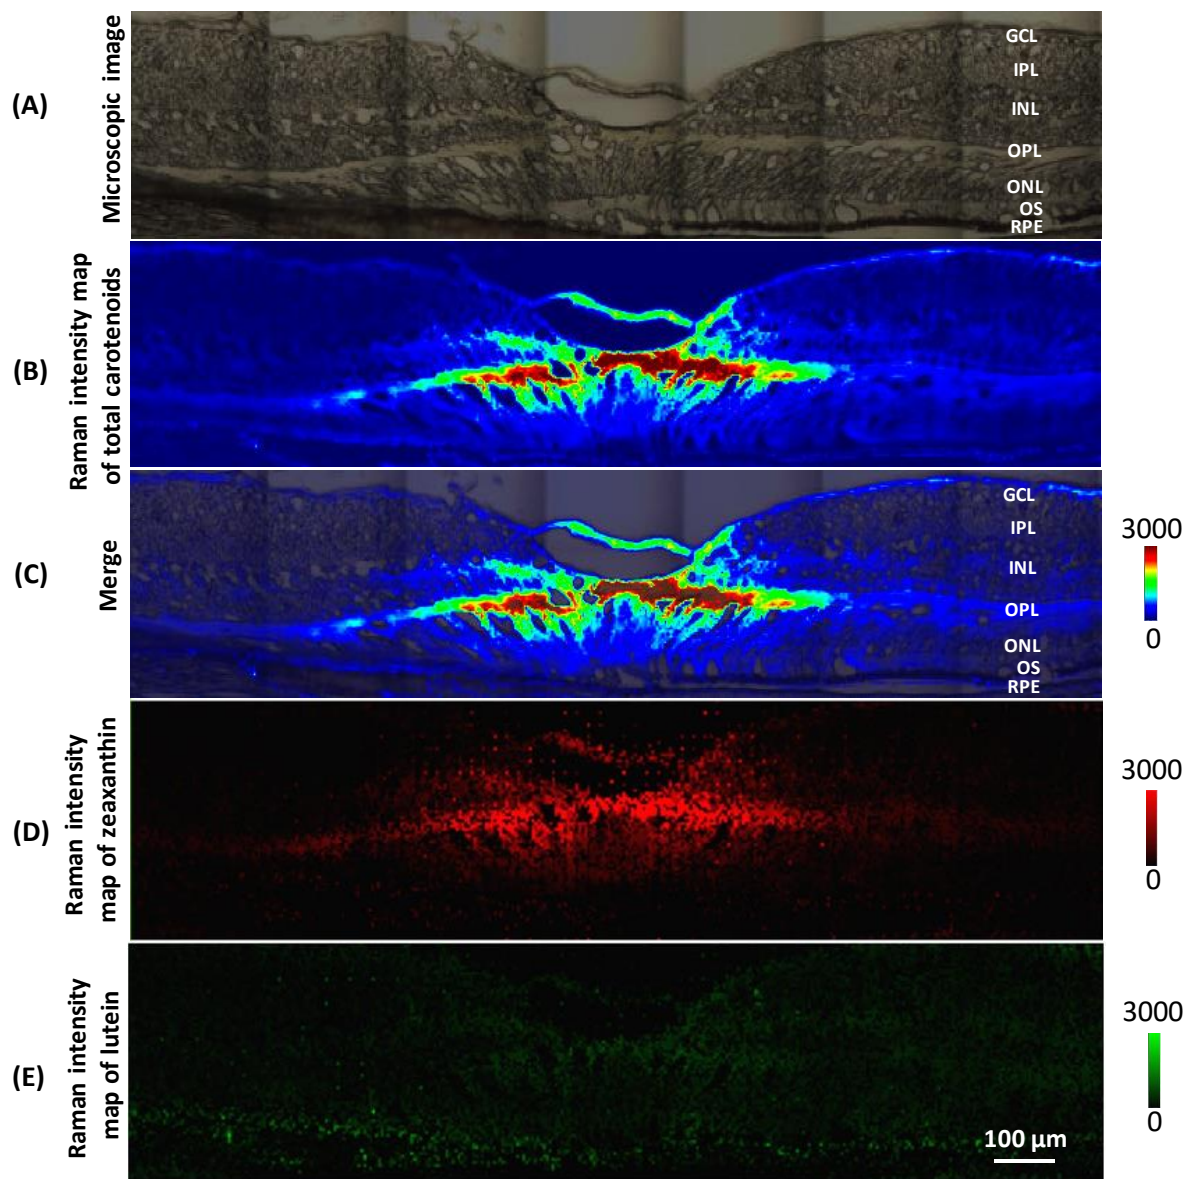

**Fig. S4.** Distribution of carotenoids in a human retinal section. (A) microscopic image of a foveal section from a healthy 81-y-o female donor; (B) an intensity map of total carotenoids created using Raman shifts ranged from  $1500\text{ cm}^{-1}$  to  $1550\text{ cm}^{-1}$ ; (C) overlay of A and B; (D) intensity map of zeaxanthin generated using CLS fitting; (E) intensity map of lutein generated using CLS fitting.

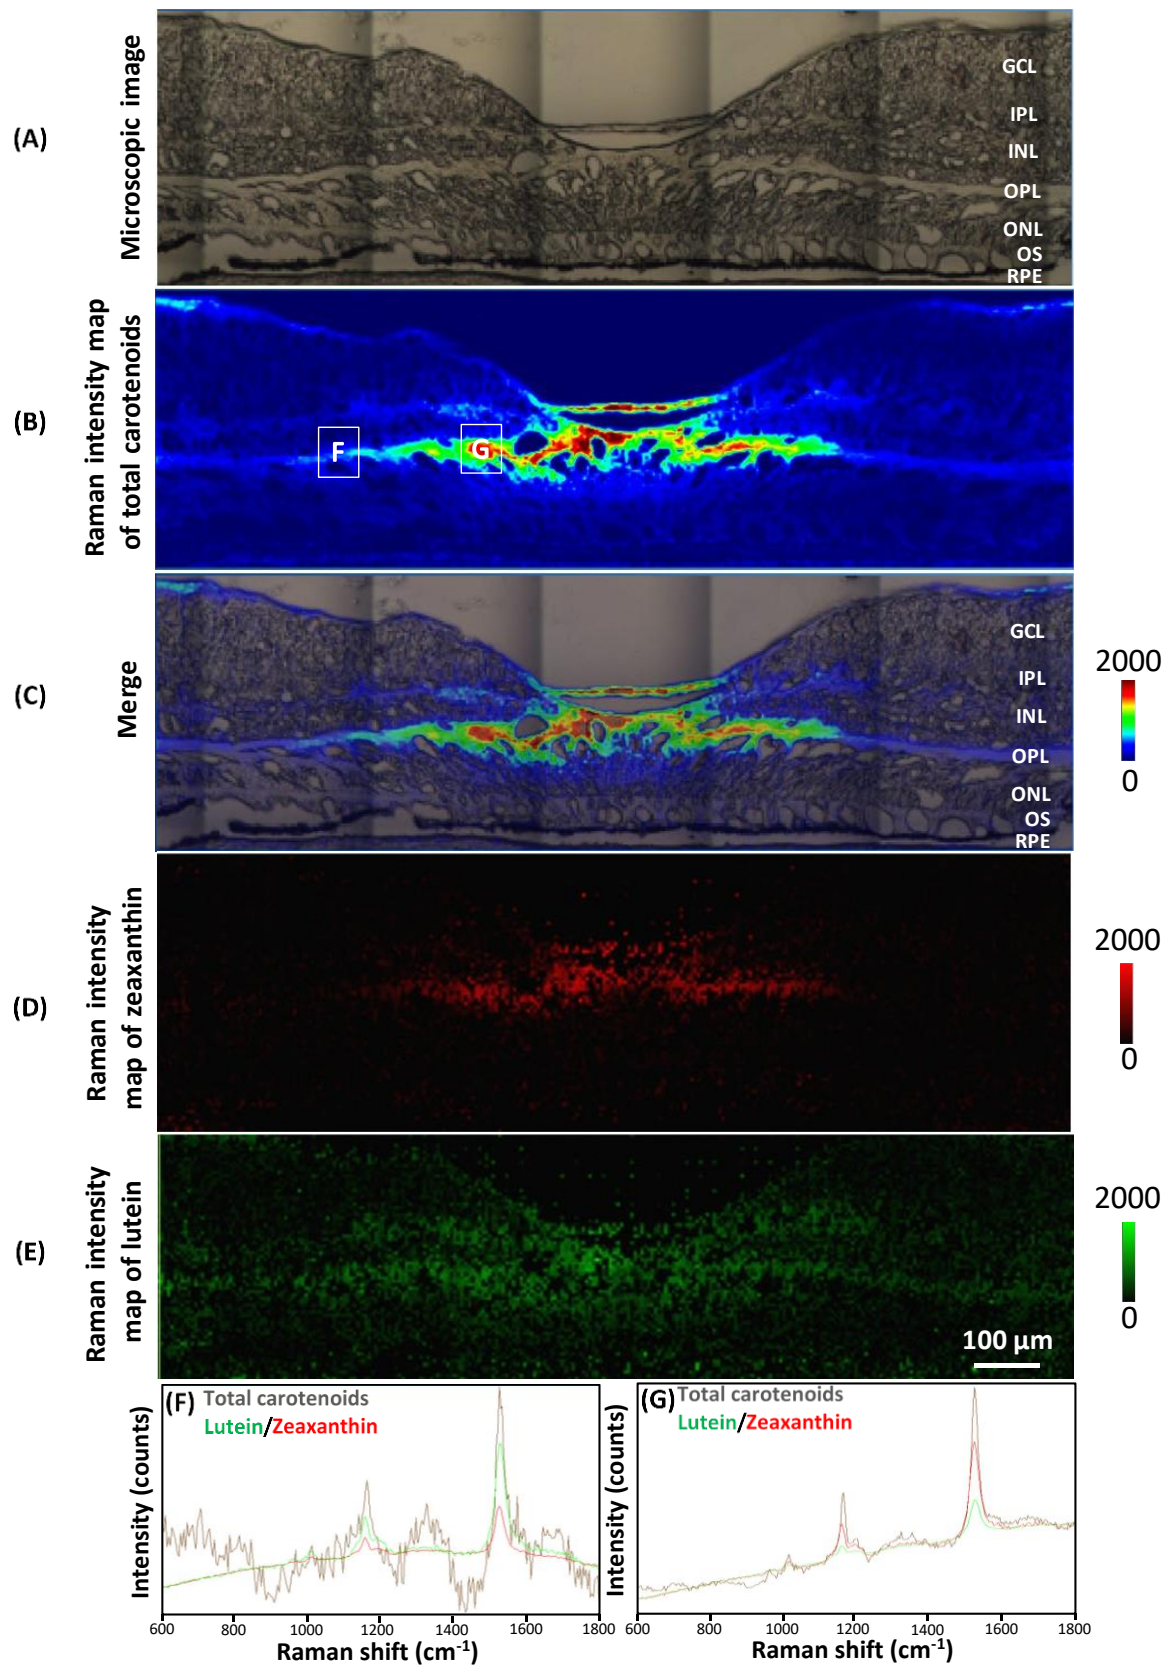

**Fig. S5.** Distribution of carotenoids in a human retinal section. (A) microscopic image of a parafoveal section from a healthy 81-y-o female donor about 40  $\mu\text{m}$  away from the section in **Fig. S4**; (B) The intensity map of total carotenoids created using Raman shifts ranged from 1500  $\text{cm}^{-1}$  to 1550  $\text{cm}^{-1}$ ; (C) overlay of A and B; (D) intensity map of zeaxanthin generated using CLS fitting; (E) intensity map of lutein generated using CLS fitting; (F,G) Raman spectra of two selected spots in (B), of which total carotenoid, lutein, and zeaxanthin are shown in gray, green, and red, respectively.
